# Supplementary material for: Site-selective photodeposition of Pt on a particulate Sc-La5Ti2CuS5O7 photocathode: evidence for one-dimensional charge transfer
Source: Royal Society of Chemistry journal article supplement (doi:10.1039/c4cc10297e), 2015-01-01
Supplement: c4cc10297e1.pdf [file c4cc10297e1.pdf]

**Site-selective photodeposition of Pt on a particulate Sc-La<sub>5</sub>Ti<sub>2</sub>CuS<sub>5</sub>O<sub>7</sub>  
photocathode: evidence for one-dimensional charge transfer**

Guijun Ma,<sup>a,b</sup> Jingyuan Liu,<sup>a</sup> Takashi Hisatomi,<sup>a,b</sup> Tsutomu Minegishi,<sup>a,b</sup> Yosuke  
Moriya,<sup>a,b</sup> Motoki Iwase,<sup>a,b</sup> Hiroshi Nishiyama,<sup>b,c</sup> Masao Katayama,<sup>a,b</sup> Taro Yamada<sup>b,c</sup>  
and Kazunari Domen<sup>\*a,b</sup>

**Corresponding Author:**

Department of Chemical System Engineering, The University of Tokyo, 7-3-1 Hongo,  
Bunkyo-ku, Tokyo 113-8656, Japan

Tel: (+81) -3-5841-1148, Fax: (+81) -3-5841-8838,

E-mail address: domen@chemsys.t.u-tokyo.ac.jp (K. Domen)

<sup>\*</sup>To whom correspondence should be addressed

**Author Affiliations:**

<sup>a</sup> Department of Chemical System Engineering, The University of Tokyo, 7-3-1  
Hongo, Bunkyo-ku, Tokyo 113-8656, Japan

<sup>b</sup> Japan Technological Research Association of Artificial Photosynthetic Chemical  
Process (ARPCChem), 5-1-5 Kashiwanoha, Kashiwa-shi, 277-8589 Chiba, Japan

<sup>c</sup> Department of Chemical System Engineering, The University of Tokyo, 5-1-5  
Kashiwanoha, Kashiwa-shi, 277-8589 Chiba, Japan

## **Contents:**

Experimental details

Figure S1. SEM image of Sc-LTC powder

Figure S2. Fabrication of Sc-LTC/Au electrodes by PT method

Figure S3. Time-current curve for PEC loading of Pt on Sc-LTC/Au photocathode

Figure S4. SEM images of Pt/Sc-LTC/Au electrodes. The Pt is deposited in a solution containing  $\text{Na}_2\text{SO}_4$  (0.1 M),  $\text{K}_2\text{C}_2\text{O}_4$  (0.1 M), and  $\text{H}_2\text{PtCl}_6$  ( $10 \times 10^{-6}$  M)

Figure S5. SEM images of Pt/Sc-LTC/Au electrodes. The Pt was deposited in a solution containing  $\text{Na}_2\text{SO}_4$  (0.1 M) and  $\text{H}_2\text{PtCl}_6$  ( $10 \times 10^{-6}$  M)

Figure S6. SEM and EDX analysis of Pd/Sc-LTC/Au electrodes. The Pd was deposited in a solution containing  $\text{Na}_2\text{SO}_4$  (0.1 M),  $\text{K}_2\text{C}_2\text{O}_4$  (0.1 M), and  $(\text{NH}_4)_2\text{PdCl}_4$  ( $15 \times 10^{-6}$  M)

Figure S7 Crystal structure of  $\text{La}_5\text{Ti}_2\text{CuS}_5\text{O}_7$  viewed along b and c axes (depicted using Vesta)

## Experimental details:

### 1. Preparation of Sc-doped $\text{La}_5\text{Ti}_2\text{CuS}_5\text{O}_7$ (Sc-LTC) powder<sup>1,2</sup>

Sc-LTC powder was prepared by a solid-state reaction.  $\text{La}_2\text{O}_3$  (99.99%, Kanto Chemical),  $\text{La}_2\text{S}_3$  (99.9%, Kojundo Chemical),  $\text{TiO}_2$  (rutile, 99.0%, Kanto Chemical),  $\text{Sc}_2\text{O}_3$  (99.9%, Kojundo Chemical) and  $\text{Cu}_2\text{S}$  (99%, Kojundo Chemical) in a molar ratio of 2 : 3 : 3.96 : 0.02 : 1 were mixed and ground in a glove box filled with  $\text{N}_2$ . 25 mol% sulfur powder with respect to Sc:LTC was added into the precursor mix to obtain a sulfur-rich atmosphere. The total amount of the precursors was typically 1.5-2.0 g. The mixture was sealed in an evacuated quartz tube ( $\phi$  8 mm  $\times$  L 80 mm) and calcined at 1273 K for 48 h. After heating, the sintered samples were ground into powder. The LTC obtained was a highly crystallized, rod-shaped material. The diameters of the LTC rods ranged from 0.7 to 1.4  $\mu\text{m}$ , and their lengths varied from 2 to 6  $\mu\text{m}$ .

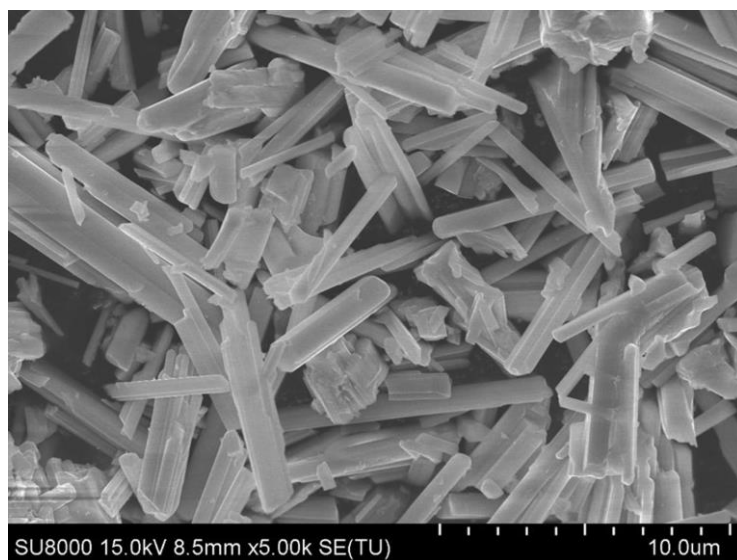

**Figure S1.** SEM image of Sc-LTC powder.

## 2. Fabrication of Sc-LTC/Au photoelectrodes by the particle transfer (PT) method<sup>3</sup>

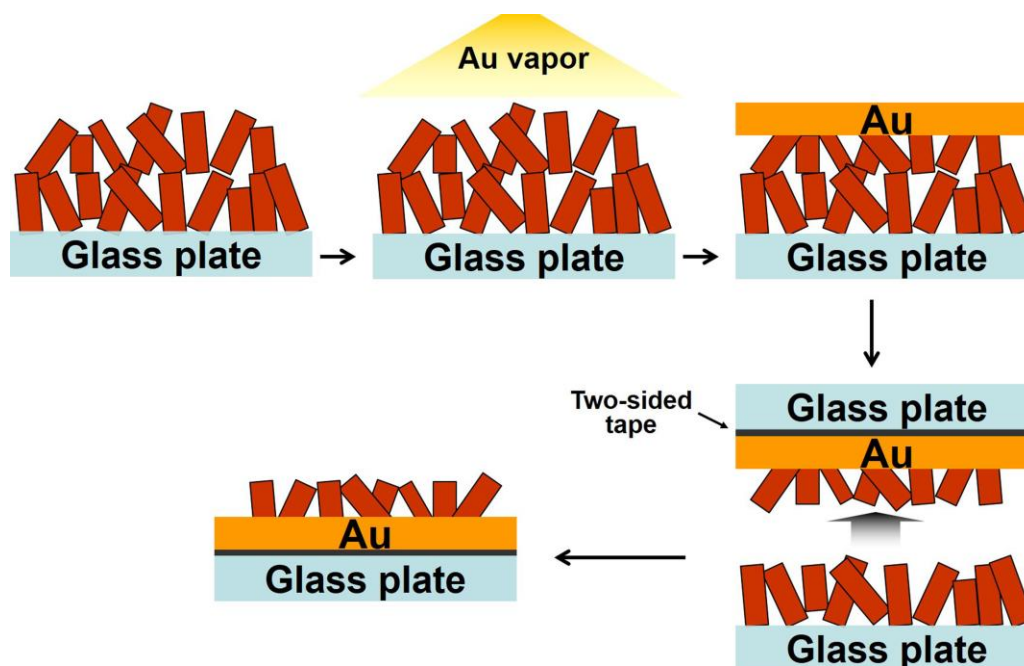

**Figure S2.** Fabrication of LTC/Au electrodes by PT method.

The fabrication process of Sc-LTC/Au photocathodes by the PT method is illustrated in Fig. S2. First, the LTC powder was densely dispersed on a glass plate. Then, a 2.5- $\mu\text{m}$ -thick layer of Au metal was deposited on the top of the LTC powder layer by thermal vapor deposition (TVD). In this process, the top layer of Sc-LTC particles was embedded in the Au film. This ensured an intimate contact between the semiconductor and the metal substrate. The Au film was bonded to a second glass plate by double-sided tape, and then peeled off from the primary glass plate. The physically adsorbed Sc-LTC particles were removed by ultrasonication in water. Finally, the photoelectrode was obtained with a stacked structure of Sc-LTC/Au/tape/glass plate.

### **3. Loading of Pt on Sc-LTC/Au by sputtering<sup>2</sup>**

Pt was loaded on Sc-LTC/Au by radio-frequency (RF) magnetron sputtering using high-purity Ar gas as a plasma source. The pressure inside the vacuum chamber was set at  $3 \times 10^{-3}$  Pa during sputtering. Pt with a nominal thickness of approximately 1 nm was loaded on LTC/Au by continuous sputtering for 5 min.

### **4. Loading of Pt on Sc-LTC/Au by photoelectrochemical (PEC) reduction**

Pt was loaded on Sc-LTC/Au by PEC reduction using a typical three-electrode system. A Pt wire and Ag/AgCl were used as counter and reference electrodes, respectively. The electrolyte solution used was H<sub>2</sub>O (100 mL) containing Na<sub>2</sub>SO<sub>4</sub> (0.1 M), K<sub>2</sub>C<sub>2</sub>O<sub>4</sub> (0.1 M), and H<sub>2</sub>PtCl<sub>6</sub> ( $3.5 \times 10^{-6}$  M for PEC measurements and  $10 \times 10^{-6}$  M for SEM and EDX measurements). The pH of the electrolyte solution was adjusted to 10 by an aqueous NaOH solution. Light irradiation was performed using a solar light simulator (AM 1.5 G). The irradiated area of the Sc-LTC/Au electrode was approximately 0.4 cm<sup>2</sup>. The Pt deposition potential was set to -0.69 V vs. Ag/AgCl. During the reaction, the electrolyte solution was vigorously stirred under flowing Ar. A typical time-current curve for PEC loading of Pt on Sc-LTC/Au is shown in Fig. S3. The reaction was stopped when the photocurrent leveled off. The prepared Pt/Sc-LTC/Ti electrode was washed with copious amounts of deionized water prior to use.

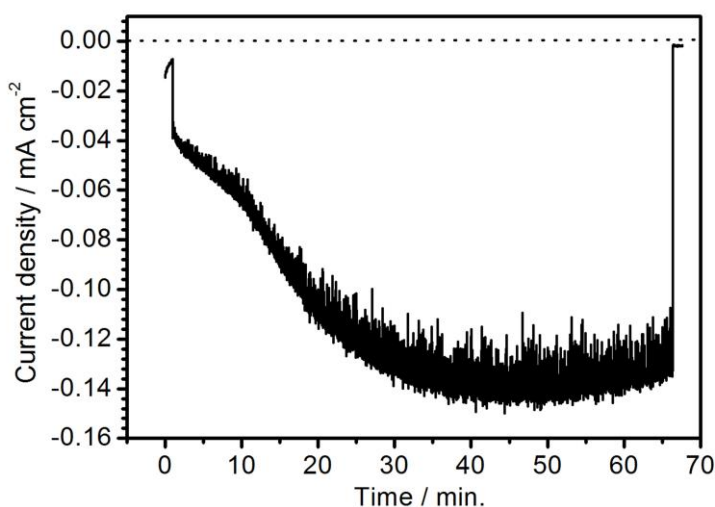

**Figure S3.** Time-current curve for PEC loading of Pt on Sc-LTC/Au photocathode.

The standard redox potentials of some Pt species are listed below:

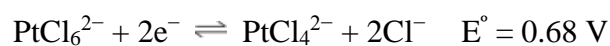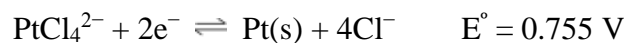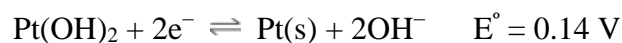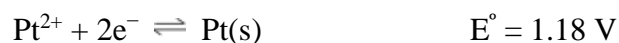

## 5. PEC measurements of Pt/Sc-LTC/Au photocathodes

Current-potential curves of Pt/Sc-LTC/Au were measured in the above PEC system by using a Pt wire and Ag/AgCl as counter and reference electrodes, respectively. The cell was filled with an aqueous solution of 0.1 M Na<sub>2</sub>SO<sub>4</sub> (pH adjusted to 10 by NaOH addition). A solar light simulator (AM 1.5 G) was used as the light source.

## References

- 1 T. Suzuki, T. Hisatomi, K. Teramura, Y. Shimodaira, H. Kobayashi, K. Domen, *Phys. Chem. Chem. Phys.*, 2012, **14**, 15475.
- 2 J. Liu, T. Hisatomi, G. Ma, A. Iwanaga, T. Minegishi, Y. Moriya, M. Katayama, J. Kubota, K. Domen, *Energy Environ. Sci.*, 2014, **7**, 2239.
- 3 T. Minegishi, N. Nishimura, J. Kubota, K. Domen, *Chem. Sci.*, 2013, **4**, 1120.
- 4 K. Homma, F. Izumi, *J. Appl. Cryst.*, 2011, **44**, 1272.

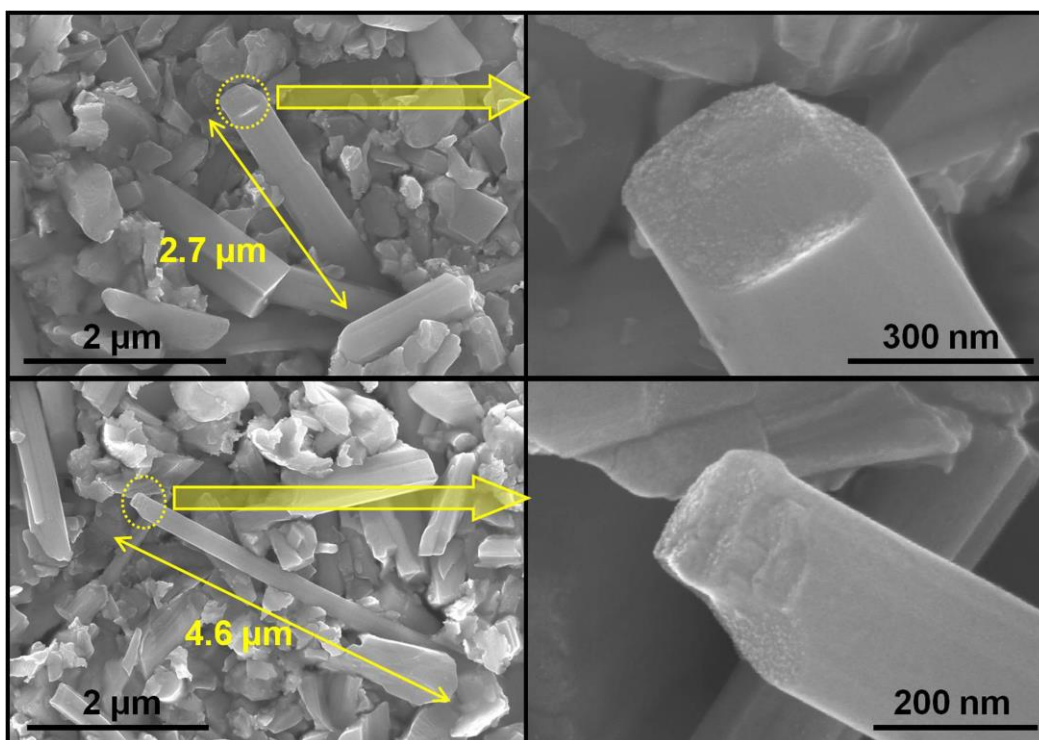

**Figure S4.** SEM images of Pt/Sc-LTC/Au electrodes. The Pt is deposited in a solution containing

$\text{Na}_2\text{SO}_4$  (0.1 M),  $\text{K}_2\text{C}_2\text{O}_4$  (0.1 M), and  $\text{H}_2\text{PtCl}_6$  ( $10 \times 10^{-6}$  M).

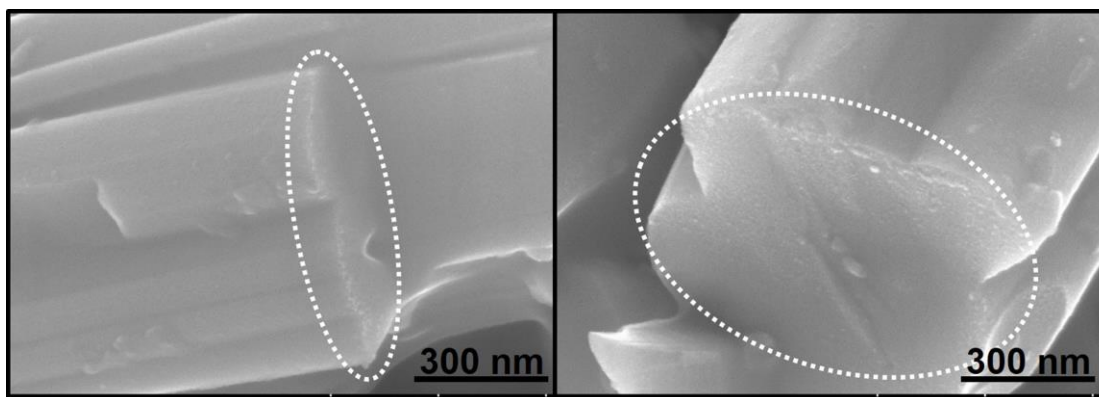

**Figure S5.** SEM images of Pt/Sc-LTC/Au electrodes. The Pt was deposited in a solution containing  $\text{Na}_2\text{SO}_4$  (0.1 M) and  $\text{H}_2\text{PtCl}_6$  ( $10 \times 10^{-6}$  M).

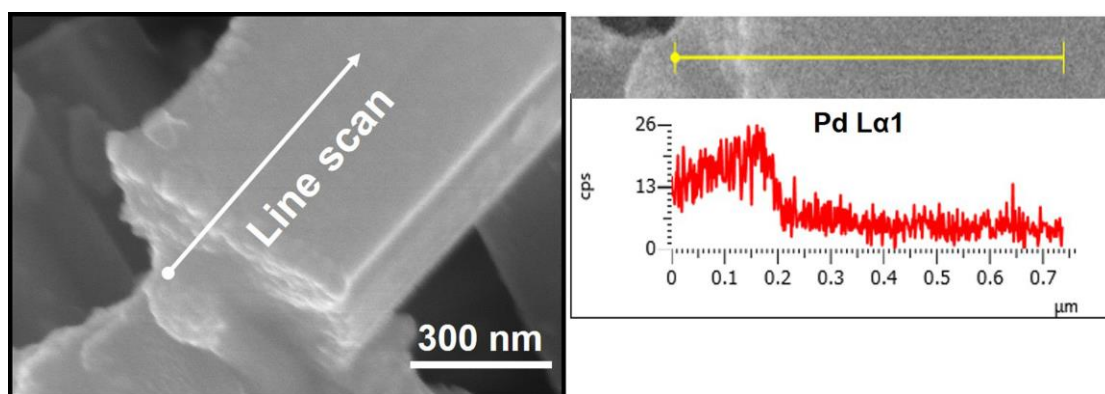

**Figure S6.** SEM and EDX analysis of Pd/Sc-LTC/Au electrodes. The Pd was deposited in a solution containing  $\text{Na}_2\text{SO}_4$  (0.1 M),  $\text{K}_2\text{C}_2\text{O}_4$  (0.1 M), and  $(\text{NH}_4)_2\text{PdCl}_4$  ( $15 \times 10^{-6}$  M).

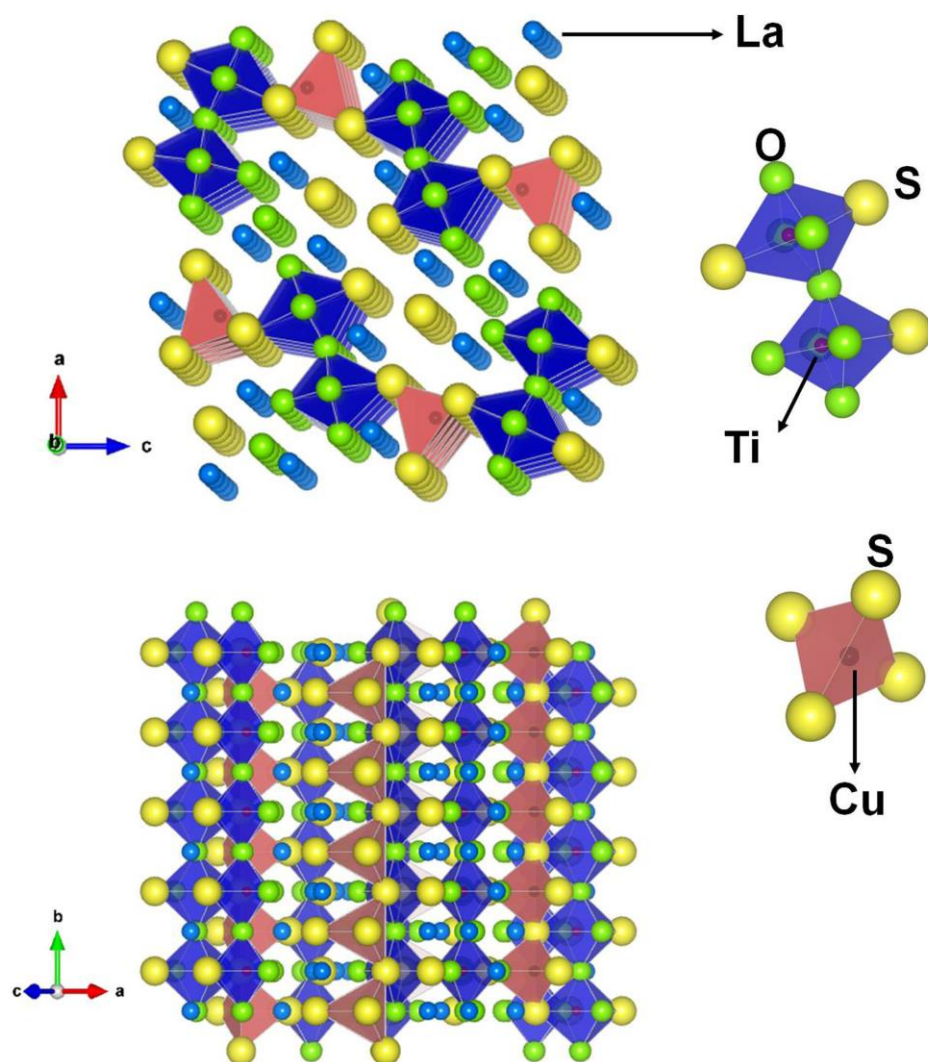

**Figure S7.** Crystal structure of  $\text{La}_5\text{Ti}_2\text{CuS}_5\text{O}_7$  viewed along  $b$  and  $c$  axes (depicted using Vesta<sup>4</sup>).
